# Supplementary material
Source: HighWire-hosted journal article supplement (https://bmjopen.bmj.com/content/10/7/e035101)
Supplement: inline-supplementary-material-1 [file inline-supplementary-material-1.pdf]

## Supplementary file 1: Characteristics of the original cohorts

Table 1: Characteristics of the original cohorts

|                                 | <b>CHECK</b><br>Utrecht | <b>HOSTAS</b><br>Leiden | <b>MUST</b><br>Oslo | <b>PROCOAC</b><br>À Coruña | <b>DIGICOD</b><br>Paris |
|---------------------------------|-------------------------|-------------------------|---------------------|----------------------------|-------------------------|
| <b>Total number of patients</b> | 1002                    | 538                     | 630                 | 743                        | 430                     |
| <b>Age (years)</b>              | 56 (5)                  | 61 (9)                  | 64 (9)              | 63 (25)                    | 67 (7)                  |
| <b>Inclusion period</b>         | 2002-2005               | 2009-2015               | 2010-2013           | 2005-2016                  | 2013-2017               |
| <b>Female (%)</b>               | 79%                     | 86%                     | 69%                 | 76%                        | 78%                     |
| <b>BMI</b>                      | 26 (4)                  | 27 (5)                  | 28 (5)              | 29 (5)                     | 25 (3)                  |
| <b>Type of OA</b>               | Knee, Hip               | Hand                    | Knee, Hip,<br>Hand  | Knee, Hip,<br>Hand         | Hand                    |
| <b>WOMAC Knee</b>               |                         | n/a                     | n/a                 |                            | n/a                     |
| - <b>Pain (0-20)</b>            | 5 (3)                   |                         |                     | 4 (3)                      |                         |
| - <b>Stiffness (0-8)</b>        | 3 (2)                   |                         |                     | 1.7 (1.9)                  |                         |
| - <b>Function (0-68)</b>        | 16 (11)                 |                         |                     | 14.7 (15)                  |                         |
| <b>NRS pain (0-10)</b>          | 4 (2)                   |                         | 4 (2)               |                            | 3 (2)                   |
| <b>Knee pain present</b>        | 83%                     |                         | 356                 |                            |                         |
| <b>Knee OA (ACR-criteria)</b>   | 750 (75%)               | 197 (37%)               | 102 (36%)           | 91 (19%)                   | 50 (10%)                |
| <b>Knee KL Grade</b>            |                         | n/a                     | n/a                 |                            | n/a                     |
| - <b>Grade 0</b>                | 68%                     |                         |                     | 21%                        |                         |
| - <b>Grade 1</b>                | 25%                     |                         |                     | 26%                        |                         |
| - <b>Grade 2</b>                | 6%                      |                         |                     | 27%                        |                         |
| - <b>Grade 3</b>                | 1%                      |                         |                     | 15%                        |                         |
| - <b>Grade 4</b>                |                         |                         |                     | 10%                        |                         |

Continuous variables are given as mean values, standard deviation between brackets and categorical variables as percentages. **CHECK:** Cohort Hip and Cohort Knee. **HOSTAS:** Hand OSTeoArthritis in Secondary care. **MUST:** Musculoskeletal pain in Ullensaker STudy. **PROCOAC:** PROgnostic Cohort of OsteoArthritis A Coruña. **DIGICOD:** DIGital Cohort Osteoarthritis Design. **BMI:** Body Mass Index. **WOMAC:** Western Ontario and McMaster Universities OA index. **KL:** Kellgren and Lawrence (Grade). **ACR:** American College of Rheumatology.
