# Supplementary material
Source: HighWire-hosted journal article supplement (https://bmjopen.bmj.com/content/10/7/e035101)
Supplement: inline-supplementary-material-2 [file inline-supplementary-material-2.pdf]

**Supplementary file 2: Investigational parameters***History*

The history will include questions regarding previous and current OA-related medical and surgical events and treatments or treatments and/or events that might affect any of the biomarkers. Comorbidities will be recorded according to the Charlson index.[1] Smoking habits and menopausal status will also be registered. Menopause is defined by last menstrual bleeding  $\geq 12$  months ago, without using oral contraceptives etc.

*Physical and joint examination*

Physical examination consists of a general examination and examination of knees, hips and hands. Knee examination will include warmth of the knee, effusion (positive patellar tap), passive ranges of flexion and extension, presence of a flexum, presence of varus or valgus and pain and grinding in the patellofemoral joint (grinding test). Physical examination of hips will include passive range of motions and presence of a flexum. On all hand joints, number and location of osteophytes and inflamed joints, defined by soft tissue swelling, will be evaluated. Deformity of Carpometacarpal joint 1 (CMC-1), Distal Inter Phalangeal (DIP) joints 2 and 3 and Proximal Inter Phalangeal (PIP) joints 2 and 3 and subluxation of the first metacarpal joint (MCP-1) will be reported. The articular index of Doyle will be used to determine severity of hand OA by grading pain (0-3) in 24 joints and joint groups by pressure or passive movement.[2]

*Imaging index knee*

Posteroanterior weight-bearing semiflexed (metatarsophalangeal) radiographs will be obtained according to the protocol of Buckland-Wright.[3]

Conventional and novel MRI techniques (e.g. T2 mapping) of the index knee will be performed to evaluate OA progression. These techniques visualize different tissue characteristics of the knee joint, possibly different involved in the OA process.

High resolution CT of the index knee will be performed for evaluation of bone architecture and shape analysis.

### *Imaging of other joints*

Conventional standardized radiographs of hands will be obtained. WBLDCT will be conducted to evaluate concomitant hip, shoulder and spine OA. The overall radiation exposure during two years will be approximately 6.5 mSv (table 1). A standard clinical CT of the pelvis is 10 mSv.

**Table 1: Effective dose for radiographs and CT (mSv per visit)**

|                                    | Screening | BL     | 6M     | 12M    | 24M    |
|------------------------------------|-----------|--------|--------|--------|--------|
| <b>Index knee</b>                  |           |        |        |        |        |
| - Radiograph                       | 0.0002    | -      | 0.0002 | 0.0002 | 0.0002 |
| - CT                               | -         | 0.25   | -      | -      | 0.25   |
| <b>Other imaging</b>               |           |        |        |        |        |
| - Radiographs (other knee + hands) | -         | 0.0004 | -      | -      | 0.0004 |
| - WBLDCT                           | -         | 3      | -      | -      | 3      |
| <b>Total effective dose (mSv)</b>  | 0.0002    | 3.2504 | 0.0002 | 0.0002 | 3.2506 |

**BL:** Baseline. **WBLDCT:** Whole Body Low Dose CT

### *Central reading*

In order to minimize variability, the reading and analyses of images will be done at central facilities. Knee radiographs will be graded for structural OA features according to KIDA[4], Kellgren and Lawrence (KL) grade[5] and Osteoarthritis Research Society International (OARSI) grade[6] and hand radiographs will be evaluated according to KL grade, OARSI grade and Verbruggen-Veys score.[7] Bone shape will be analyzed by the Active Shape and Appearance

Models which provide quantitative, spatial and temporal understanding of all component tissues within a given joint. Subchondral bone analysis will be performed by fractal models.

Standard MRI techniques will be used to evaluate OA features in a quantitative[8] and semi-quantitative way using MRI Osteoarthritis Knee Score (MOAKS) analysis.[9] T2-mapping will give a qualitative measurement for assessing collagen distribution and is used to evaluate cartilage morphology and condition, anterior and posterior meniscal horns, cruciate ligaments, anterior and posterior femoral and tibial osteophytes, superior and inferior patellar osteophytes, subchondral bone cysts and attrition.[10] The novel exploratory method of Active Shape and Appearance Models will also be used on MRI images since bone shape is highly specific for the presence of OA and a sensitive measurement of progression, being more responsive than radiographic joint space width and MRI cartilage volume.[11]

Bone architecture on high resolution knee CT includes bone mineral density, anisotropy, inhomogeneity, variogram slope and entropy. For shape analyses, statistical Shape Model (SSM) applications in OA using predefined landmarks on 2D or 3D images produces a mean shape and modes of shape variation of the joint. In WBLDCT it is possible to reconstruct high quality 3D data providing more detail than standard radiographs.[12] Semi-quantitative grades on a 0-3 scale will be used to score joint space narrowing and osteophytes, disc degeneration, hip OA, glenohumeral and acromioclavicular OA and OA of facet joints.[13]

### *HandScan*

The HandScan is a novel method for visualizing inflammation of the joints of hands and wrists. A pressure cuff around the lower arms is inflated, resulting in pooling of blood in the hands. This blood pooling is different in inflamed joints compared to healthy joints. The blood pooling is measured by diffuse optical transmission. Patient hands are illuminated with red/near-infrared light and the transmitted light is detected by a camera. Blood absorbs the light so blood pooling will give a decrease in the transmitted light. The scan takes about 2-3 minutes and provides an indirect measurement of joint inflammation.[14]

### *Motion analysis*

Patients will be asked to walk 20 meters at their own self-selected speed, while six GaitSmart™ sensors are attached to their body (two at the hips, two at the thighs and two at the calves).[15] Data will be analyzed with Poseidon software. Obtained gait parameters include range of motion in the sagittal plane of pelvis, hips, thighs, knees and calves, medial-lateral movement of thighs and calves, knee stance flexion, joint and segment symmetry, and stride duration.

### *Performance-based tests*

Two different performance based tests will be performed. For the 40-meter self-paced walk test patients will be asked to walk as quickly but safely as possible to a mark 10 meters away, return, and repeat for a total distance of 40 meters. For the 30-second chair stand-up test, patients are asked to stand-up from a chair and sit down again without use of their hands and arms and repeat this for 30 seconds.

### *Questionnaires*

#### *Index knee*

Patients will be asked to fill in several questionnaires. The Knee injury and Osteoarthritis Outcome Score (KOOS)[16] and Intermittent and Constant OA Pain questionnaire (ICOAP)[17] are used to evaluate OA progression in the index knee. A pain Numeric Rating Scale (NRS)[18] is used to evaluate pain for the index knee.

#### *Other questionnaires*

The Hip disability and Osteoarthritis Outcome Score (HOOS)[19], ICOAP[17] for the most painful hip, Functional Index for Hand OsteoArthritis (FIHOA)[20] and aforementioned Pain NRS[18] will

be used to assess OA in other joints. PainDETECT[21] and Short Form 36 (SF-36)[22] are used to evaluate possible other causes of pain and quality of life, respectively. In addition, a one month pain diary including three questions (1. Do you have pain in your most affected knee? 2. Did you take painkillers or analgesics for your most affected knee? 3. Did you take painkiller of analgesics for other reasons?) will be used to evaluate pain.

### *Biological samples*

Blood and midstream urine samples (fasted at baseline) will be collected, unless this is not possible for logistic reasons (e.g. long travel distance to clinical site). Fasting condition and time of last meal, physical activity within the last 24 hours and physiotherapy or spa activity within the last 72 hours will be recorded since these activities might influence biochemical markers, metabolomics and lipidomics. A maximum total volume of 113 mL blood per participant will be collected during two years (table 2)

Samples will be processed and stored at the clinical sites. Serum and plasma samples will be centrifuged at 2500xg and 4°C. Then serum will be pooled. Both, serum and plasma will be stored at -70°C to -80°C in aliquots of 0.5mL and 1 aliquot of 5mL (only serum). DNA and RNA samples will directly be stored at -70°C to -80°C. Urine samples will be centrifuged at 1500xg at 4°C and stored at -70°C to -80°C. Samples are shipped to central laboratories on a regular basis.

Parameters associated with joint pathology and metabolism will be measured. The biological pathways of interest are cartilage and bone metabolism (e.g. CTX-II), inflammation (e.g. C-reactive protein, pro-inflammatory cytokines), oxidative damage and antioxidant status (e.g. carotenoids, isoprostanes), and muscular anabolism (e.g. pro-collagen-3 n-terminal peptide). At the end of the study, the most state-of-the-art analytic approach will be used to examine these pathways.

Analysis of genomic markers (DNA and RNA) is optional and separate informed consent will be obtained. The aim is to investigate associations between genomic markers and knee OA, to assess whether different phenotypes have different genomic profiles at baseline or at study end.

Biological samples will eventually be stored in the central repository site, Biostorage (Germany), for duration of the consortium agreement. Thereafter samples will be relocated to original institutes and stored for a maximum of 15 years.

**Table 2: Volume (mL) of blood and urine collected during the APPROACH study**

|                                  | <b>BL</b> | <b>6M</b> | <b>12M</b> | <b>24M</b> |
|----------------------------------|-----------|-----------|------------|------------|
| <b>Urine for biomarkers</b>      | 50mL      | 50mL      | 50mL       | 50mL       |
| <b>Blood for biomarkers</b>      |           |           |            |            |
| - Plasma                         | 21mL      | 21mL      | 21mL       | 21mL       |
| - Serum                          | 7mL       |           |            |            |
| <b>Blood for genomic markers</b> |           |           |            |            |
| - DNA                            | 8.5mL     |           |            | 8.5mL      |
| - RNA                            | 2.5mL     |           |            | 2.5mL      |

**BL:** Baseline. **mL:** milliliter. **DNA:** Deoxyribonucleic acid. **RNA:** Ribonucleic acid.

1. M. E. Charlson, P. Pompei, K. L. Ales, et al. A new method of classifying prognostic comorbidity in longitudinal studies: development and validation. *J Chronic Dis* 1987;40(5):373-83. [published Online First: 1987/01/01]
2. D. V. Doyle, P. A. Dieppe, J. Scott, et al. An articular index for the assessment of osteoarthritis. *Ann Rheum Dis* 1981;40(1):75-8. [published Online First: 1981/02/01]
3. J. C. Buckland-Wright, R. J. Ward, C. Peterfy, et al. Reproducibility of the semiflexed (metatarsophalangeal) radiographic knee position and automated measurements of medial tibiofemoral joint space width in a multicenter clinical trial of knee osteoarthritis. *J Rheumatol* 2004;31(8):1588-97. [published Online First: 2004/08/04]
4. A. C. Marijnissen, K. L. Vincken, P. A. Vos, et al. Knee Images Digital Analysis (KIDA): a novel method to quantify individual radiographic features of knee osteoarthritis in detail. *Osteoarthritis Cartilage* 2008;16(2):234-43. doi: 10.1016/j.joca.2007.06.009 [published Online First: 2007/08/19]
5. J. H. Kellgren and J. S. Lawrence. Radiological assessment of osteo-arthritis. *Ann Rheum Dis* 1957;16(4):494-502. [published Online First: 1957/12/01]
6. R. D. Altman and G. E. Gold. Atlas of individual radiographic features in osteoarthritis, revised. *Osteoarthritis Cartilage* 2007;15 Suppl A:A1-56. doi: 10.1016/j.joca.2006.11.009 [published Online First: 2007/02/27]
7. G. Verbruggen and E. M. Veys. Erosive and non-erosive hand osteoarthritis. Use and limitations of two scoring systems. *Osteoarthritis Cartilage* 2000;8 Suppl A:S45-54. [published Online First: 2001/01/13]
8. W. Wirth and F. Eckstein. A technique for regional analysis of femorotibial cartilage thickness based on quantitative magnetic resonance imaging. *IEEE Trans Med Imaging* 2008;27(6):737-44. doi: 10.1109/TMI.2007.907323
9. D. J. Hunter, A. Guermazi, G. H. Lo, et al. Evolution of semi-quantitative whole joint assessment of knee OA: MOAKS (MRI Osteoarthritis Knee Score). *Osteoarthritis Cartilage* 2011;19(8):990-1002. doi: 10.1016/j.joca.2011.05.004 [published Online First: 2011/06/08]
10. W. Wirth, S. Maschek and F. Eckstein. Sex- and age-dependence of region- and layer-specific knee cartilage composition (spin-spin-relaxation time) in healthy reference subjects. *Ann Anat* 2017;210:1-8. doi: 10.1016/j.aanat.2016.10.010 [published Online First: 2016/11/12]
11. M. A. Bowes, G. R. Vincent, C. B. Wolstenholme, et al. A novel method for bone area measurement provides new insights into osteoarthritis and its progression. *Ann Rheum Dis* 2015;74(3):519-25. doi: 10.1136/annrheumdis-2013-204052 [published Online First: 2013/12/07]
12. M. Alshamari, M. Geijer, E. Norrman, et al. Low dose CT of the lumbar spine compared with radiography: a study on image quality with implications for clinical practice. *Acta Radiol* 2016;57(5):602-11. doi: 10.1177/0284185115595667
13. W. Gielis, W. Foppen, F. J. Nap, et al. Whole body low dose CT to assess overall burden of osteoarthritis: development of an atlas and reliability testing of a new scoring system [abstract]. *Osteoarthritis Cartilage* 2019;27:S320. doi: 10.1016/j.joca.2019.02.721

14. M. van Onna, D. F. Ten Cate, K. L. Tsoi, et al. Assessment of disease activity in patients with rheumatoid arthritis using optical spectral transmission measurements, a non-invasive imaging technique. *Ann Rheum Dis* 2016;75(3):511-8. doi: 10.1136/annrheumdis-2015-207315 [published Online First: 2015/10/11]
15. R. Zugner, R. Tranberg, J. Timperley, et al. Validation of inertial measurement units with optical tracking system in patients operated with Total hip arthroplasty. *BMC Musculoskelet Disord* 2019;20(1):52. doi: 10.1186/s12891-019-2416-4 [published Online First: 2019/02/08]
16. E. M. Roos, H. P. Roos, L. S. Lohmander, et al. Knee Injury and Osteoarthritis Outcome Score (KOOS)--development of a self-administered outcome measure. *J Orthop Sports Phys Ther* 1998;28(2):88-96. doi: 10.2519/jospt.1998.28.2.88 [published Online First: 1998/08/12]
17. G. A. Hawker, A. M. Davis, M. R. French, et al. Development and preliminary psychometric testing of a new OA pain measure--an OARSI/OMERACT initiative. *Osteoarthritis Cartilage* 2008;16(4):409-14. doi: 10.1016/j.joca.2007.12.015 [published Online First: 2008/04/03]
18. W. W. Downie, P. A. Leatham, V. M. Rhind, et al. Studies with pain rating scales. *Ann Rheum Dis* 1978;37(4):378-81. [published Online First: 1978/08/01]
19. A. K. Nilsson, L. S. Lohmander, M. Klassbo, et al. Hip disability and osteoarthritis outcome score (HOOS)--validity and responsiveness in total hip replacement. *BMC Musculoskelet Disord* 2003;4:10. doi: 10.1186/1471-2474-4-10 [published Online First: 2003/06/05]
20. R. L. Dreiser, E. Maheu, G. B. Guillo, et al. Validation of an algofunctional index for osteoarthritis of the hand. *Rev Rhum Engl Ed* 1995;62(6 Suppl 1):43s-53s. [published Online First: 1995/06/01]
21. R. Freynhagen, R. Baron, U. Gockel, et al. painDETECT: a new screening questionnaire to identify neuropathic components in patients with back pain. *Curr Med Res Opin* 2006;22(10):1911-20. doi: 10.1185/030079906x132488 [published Online First: 2006/10/07]
22. J. Ware, K. Snow, M. Kosinski, et al. SF-36 Health Survey manual and interpretation guide. Boston, MA: The Health Institute, New England Medical Center, 1993.
