# Supplementary material
Source: HighWire-hosted journal article supplement (https://bmjopen.bmj.com/content/10/7/e035101)
Supplement: inline-supplementary-material-3 [file inline-supplementary-material-3.pdf]

### Supplementary file 3: Predicted progression scores for the individual centers

Total

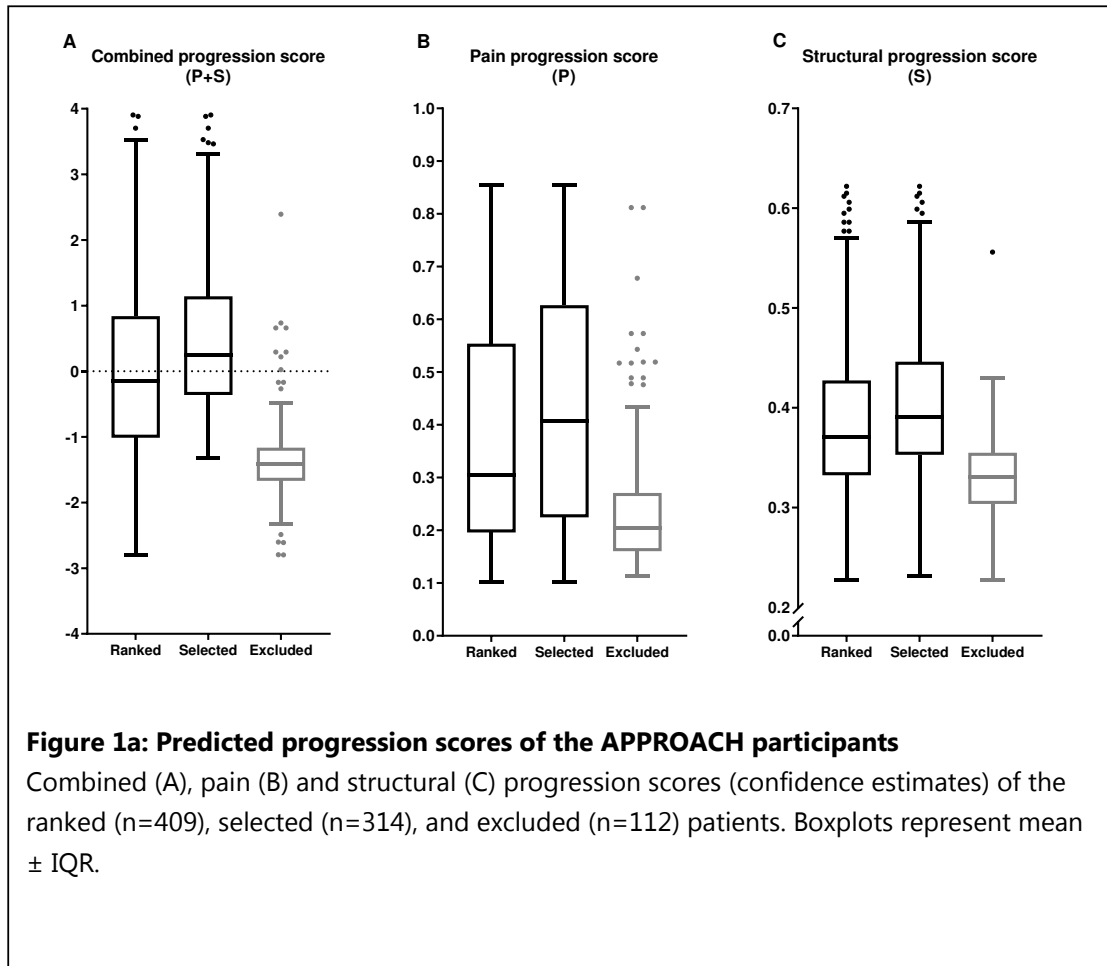

|          | N   | Combined score | P-score       | S-score       |
|----------|-----|----------------|---------------|---------------|
| Ranked   | 409 | 0.00 (1.299)   | 0.382 (0.215) | 0.384 (0.079) |
| Selected | 314 | 0.449 (1.112)  | 0.428 (0.217) | 0.403 (0.079) |
| Excluded | 112 | -1.312 (0.760) | 0.257 (0.142) | 0.327 (0.044) |

Predicted progression scores (confidence estimates) are given as mean (SD).

## Utrecht

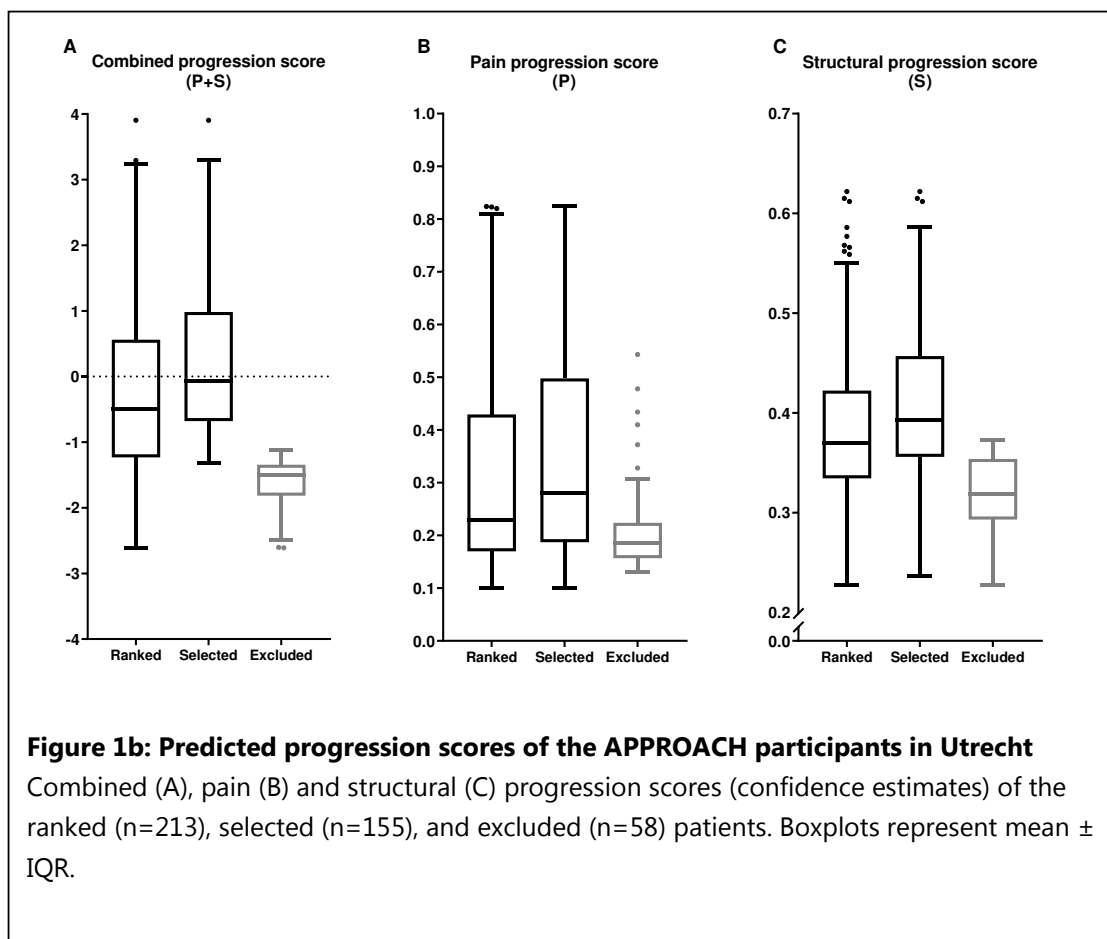

|          | <b>N</b> | <b>Combined score</b> | <b>P-score</b> | <b>S-score</b> |
|----------|----------|-----------------------|----------------|----------------|
| Ranked   | 213      | -0.295 (1.265)        | 0.317 (0.193)  | 0.385 (0.078)  |
| Selected | 155      | 0.203 (1.109)         | 0.357 (0.207)  | 0.410 (0.075)  |
| Excluded | 58       | -1.627 (0.386)        | 0.211 (0.086)  | 0.319 (0.038)  |

Progression scores are given as mean (SD).

Leiden

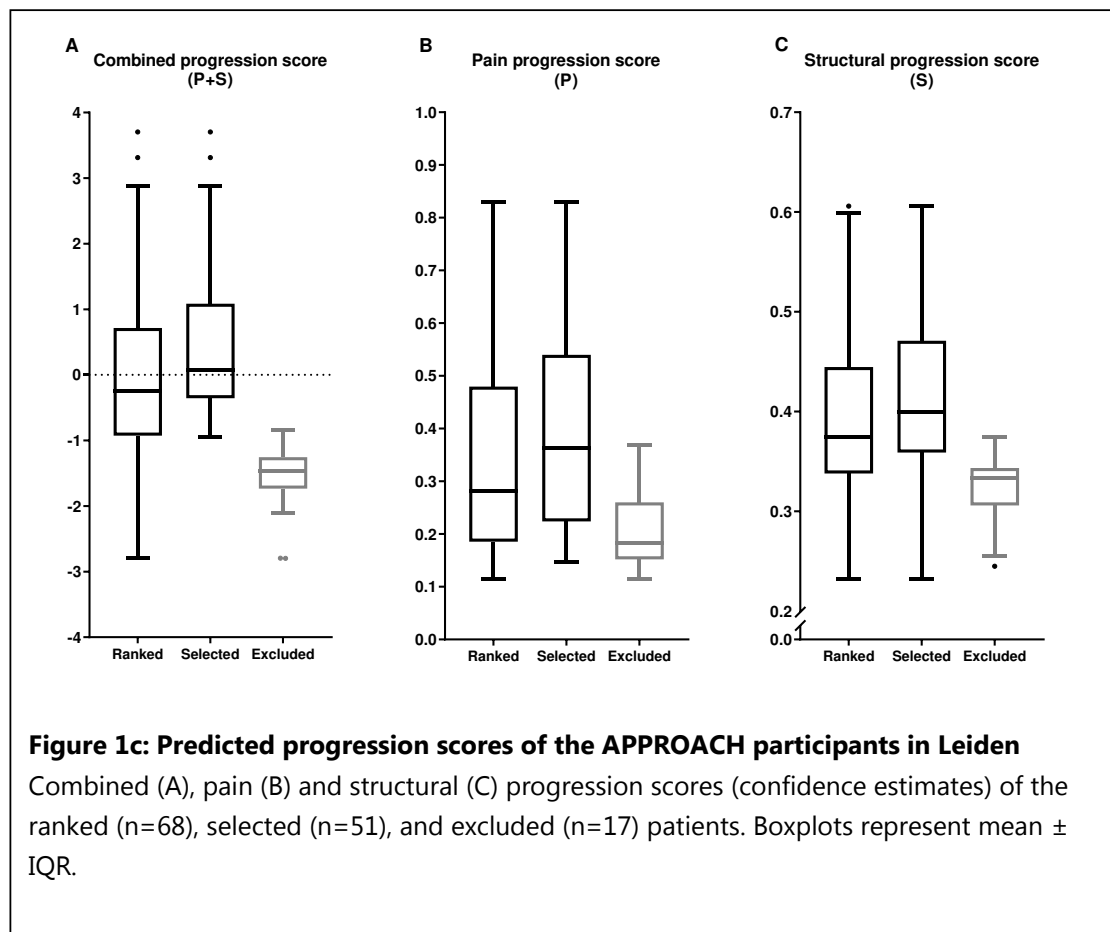

|          | <b>N</b> | <b>Combined score</b> | <b>P-score</b> | <b>S-score</b> |
|----------|----------|-----------------------|----------------|----------------|
| Ranked   | 68       | -0.045 (1.354)        | 0.355 (0.207)  | 0.391 (0.080)  |
| Selected | 51       | 0.468 (1.133)         | 0.403 (0.214)  | 0.414 (0.079)  |
| Excluded | 17       | -1.584 (0.558)        | 0.208 (0.075)  | 0.324 (0.033)  |

Progression scores are given as mean (SD).

## À Coruña

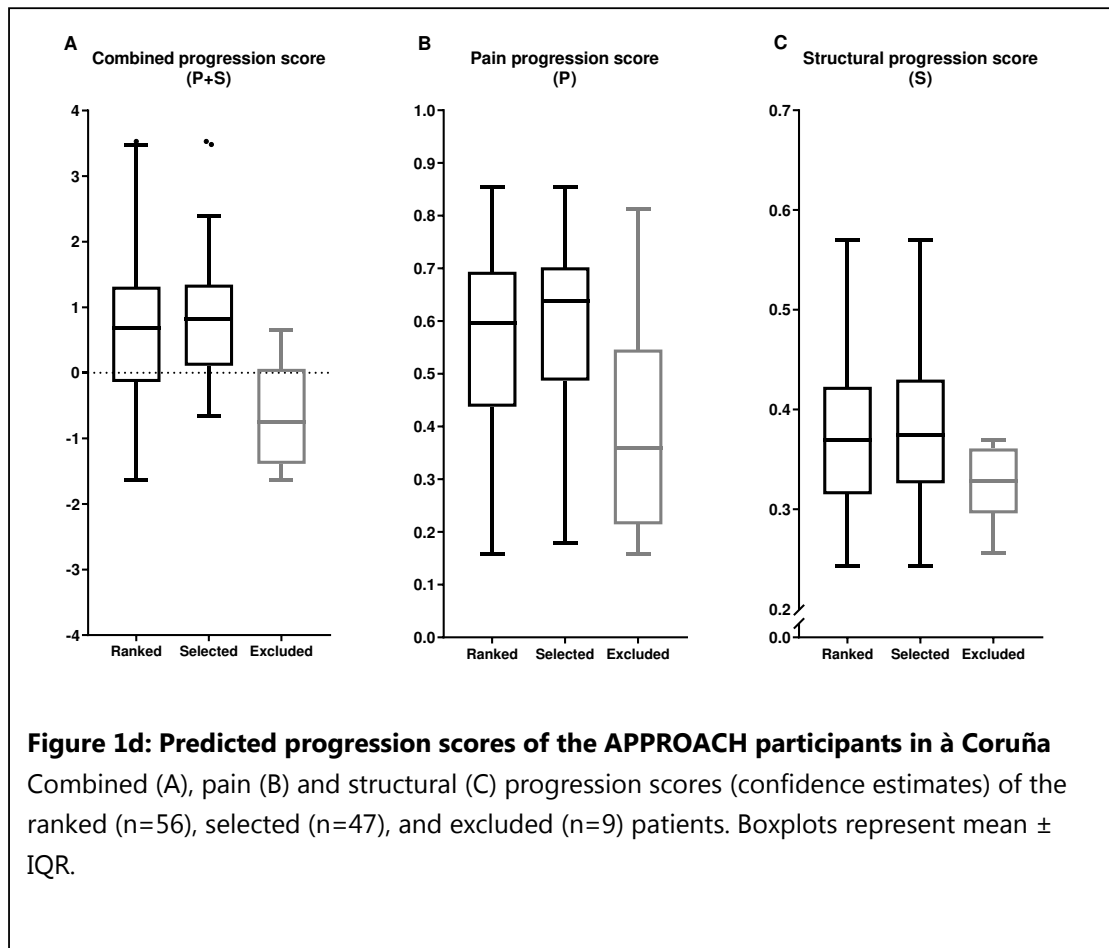

|          | <b>N</b> | <b>Combined score</b> | <b>P-score</b> | <b>S-score</b> |
|----------|----------|-----------------------|----------------|----------------|
| Ranked   | 56       | 0.653 (1.090)         | 0.559 (0.179)  | 0.371 (0.084)  |
| Selected | 47       | 0.899 (0.964)         | 0.588 (0.157)  | 0.380 (0.088)  |
| Excluded | 9        | -0.631 (0.789)        | 0.403 (0.217)  | 0.327 (0.040)  |

Progression scores are given as mean (SD).

Oslo

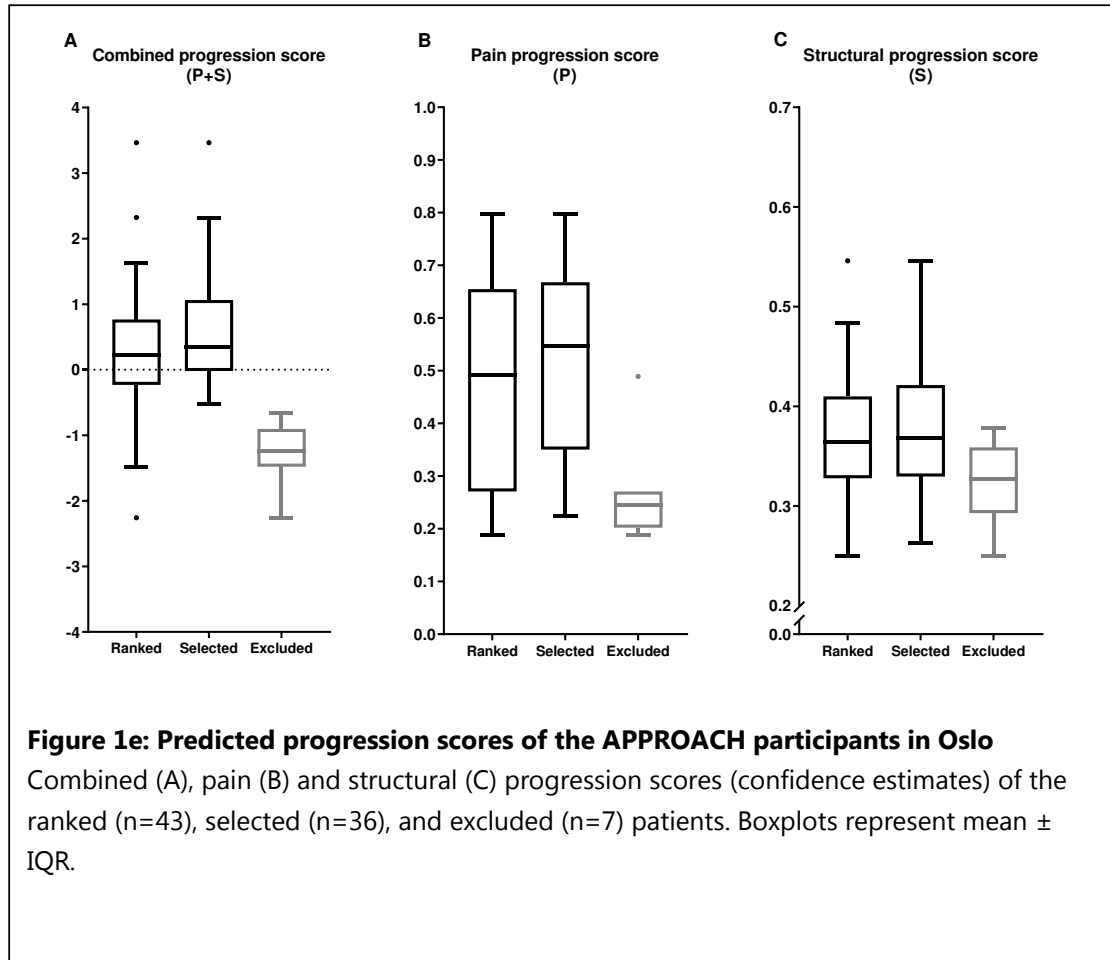

|          | <b>N</b> | <b>Combined score</b> | <b>P-score</b> | <b>S-score</b> |
|----------|----------|-----------------------|----------------|----------------|
| Ranked   | 43       | 0.243 (1.023)         | 0.475 (0.192)  | 0.370 (0.061)  |
| Selected | 36       | 0.546 (0.796)         | 0.516 (0.179)  | 0.379 (0.060)  |
| Excluded | 7        | -1.312 (0.505)        | 0.267 (0.103)  | 0.324 (0.042)  |

Progression scores are given as mean (SD).

Paris

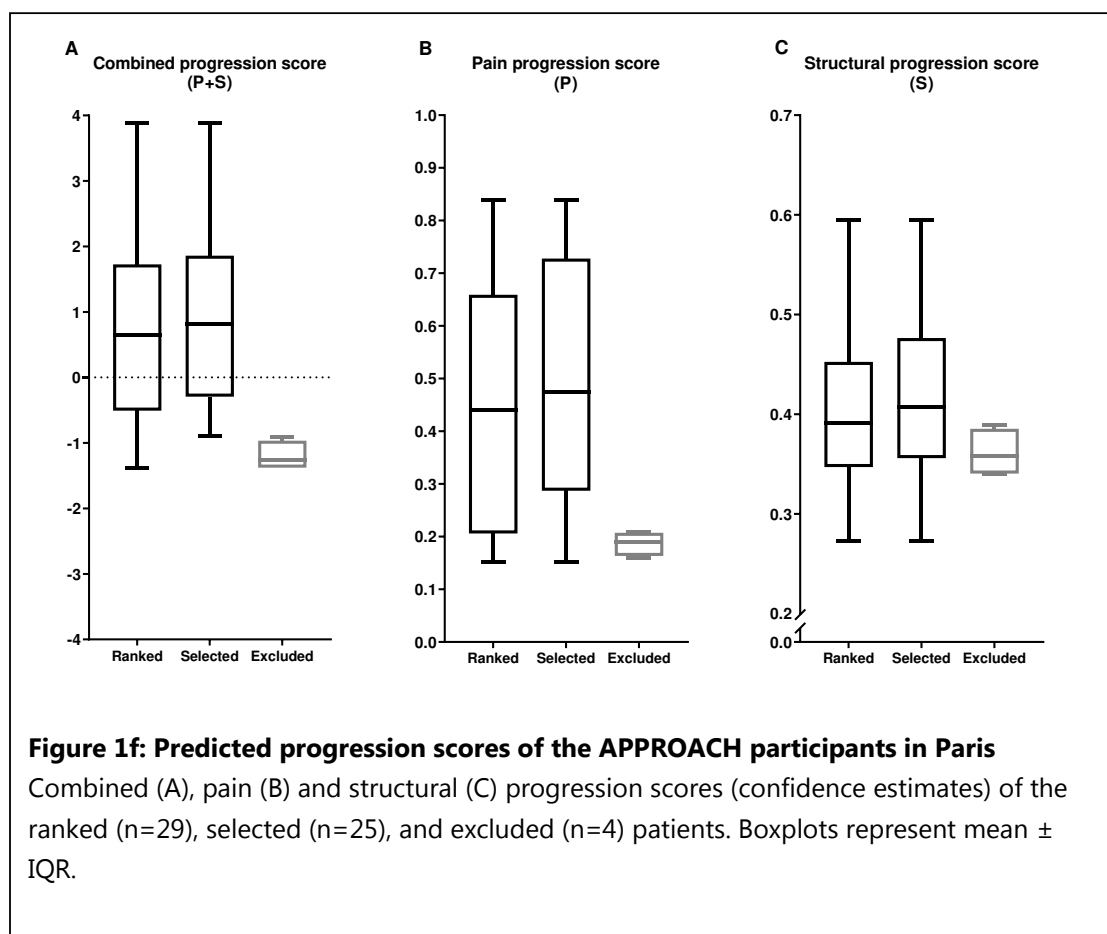

|          | <b>N</b> | <b>Combined score</b> | <b>P-score</b> | <b>S-score</b> |
|----------|----------|-----------------------|----------------|----------------|
| Ranked   | 29       | 0.651 (1.456)         | 0.449 (0.239)  | 0.411 (0.089)  |
| Selected | 25       | 0.947 (1.342)         | 0.491 (0.231)  | 0.419 (0.093)  |
| Excluded | 4        | -1.203 (0.225)        | 0.187 (0.023)  | 0.362 (0.024)  |

Progression scores are given as mean (SD).
